# Supplementary material for: Conservation planning in agricultural landscapes: hotspots of conflict between agriculture and nature
Source: PubMed Central journal article supplement (PMC4579854; doi:10.1111/ddi.12291), 2014-12-26

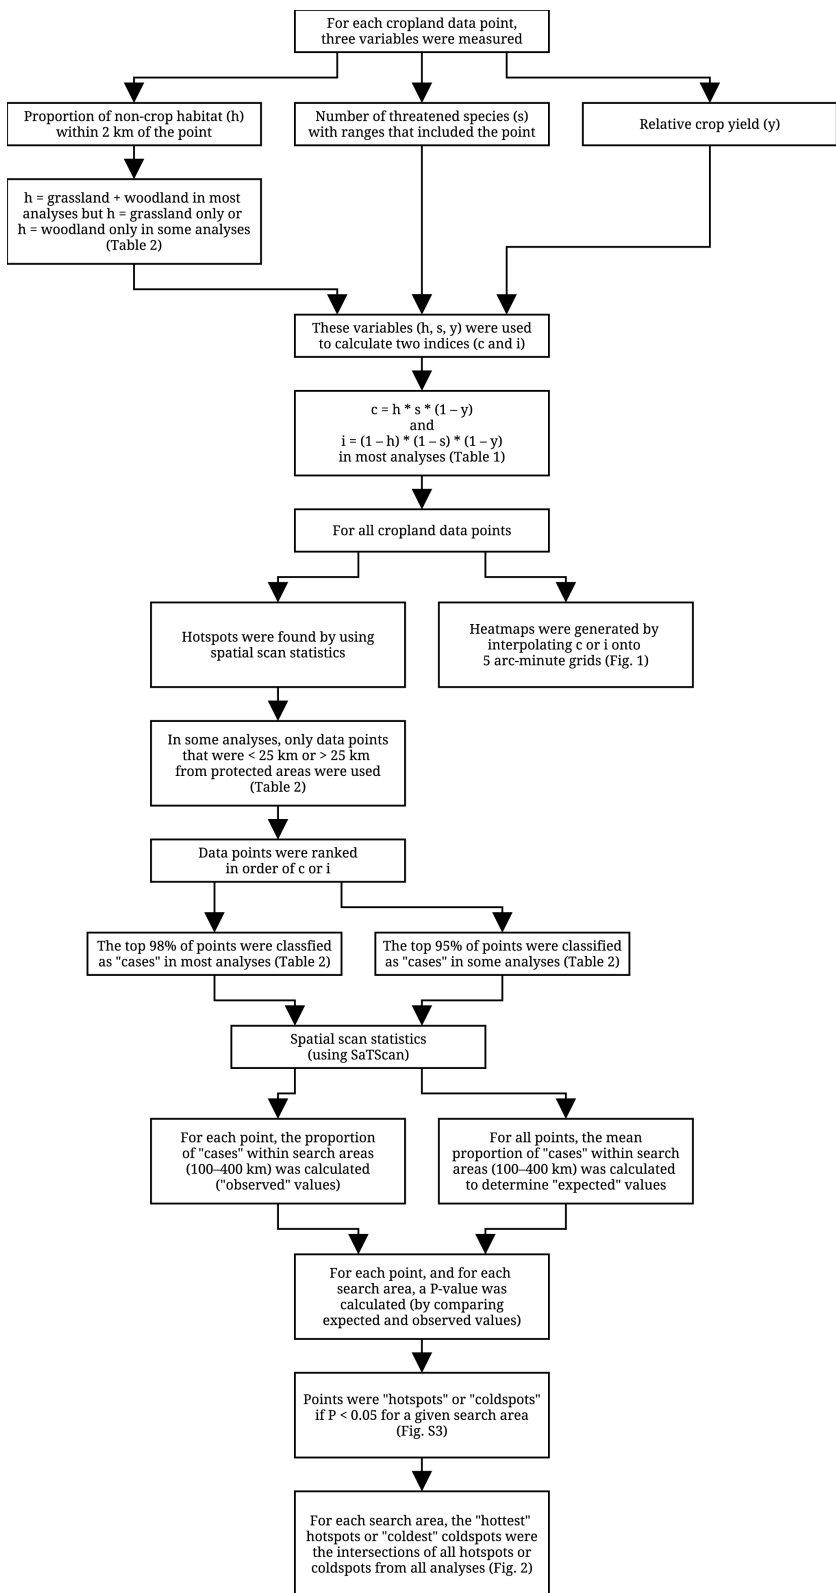

Supplement: ddi0021-0357-sd4.pdf [file ddi0021-0357-sd4.pdf]
